# Supplementary material
Source: MDPI journal article supplement (https://www.mdpi.com/2071-1050/13/9/5062)
Supplement: s1 [file sustainability-1164757-supplementary.pdf › sustainability-1164757-supplementary.pdf]

**Figure S1.** Overview of parameterized SimaPro city model driver tree for global warming with cut-off  $< 0.18\%$ . Section A, B, and C displayed in detail in Figure S2, S3, and S4, respectively. Food and goods consumption not included.

Supplementary Material S2

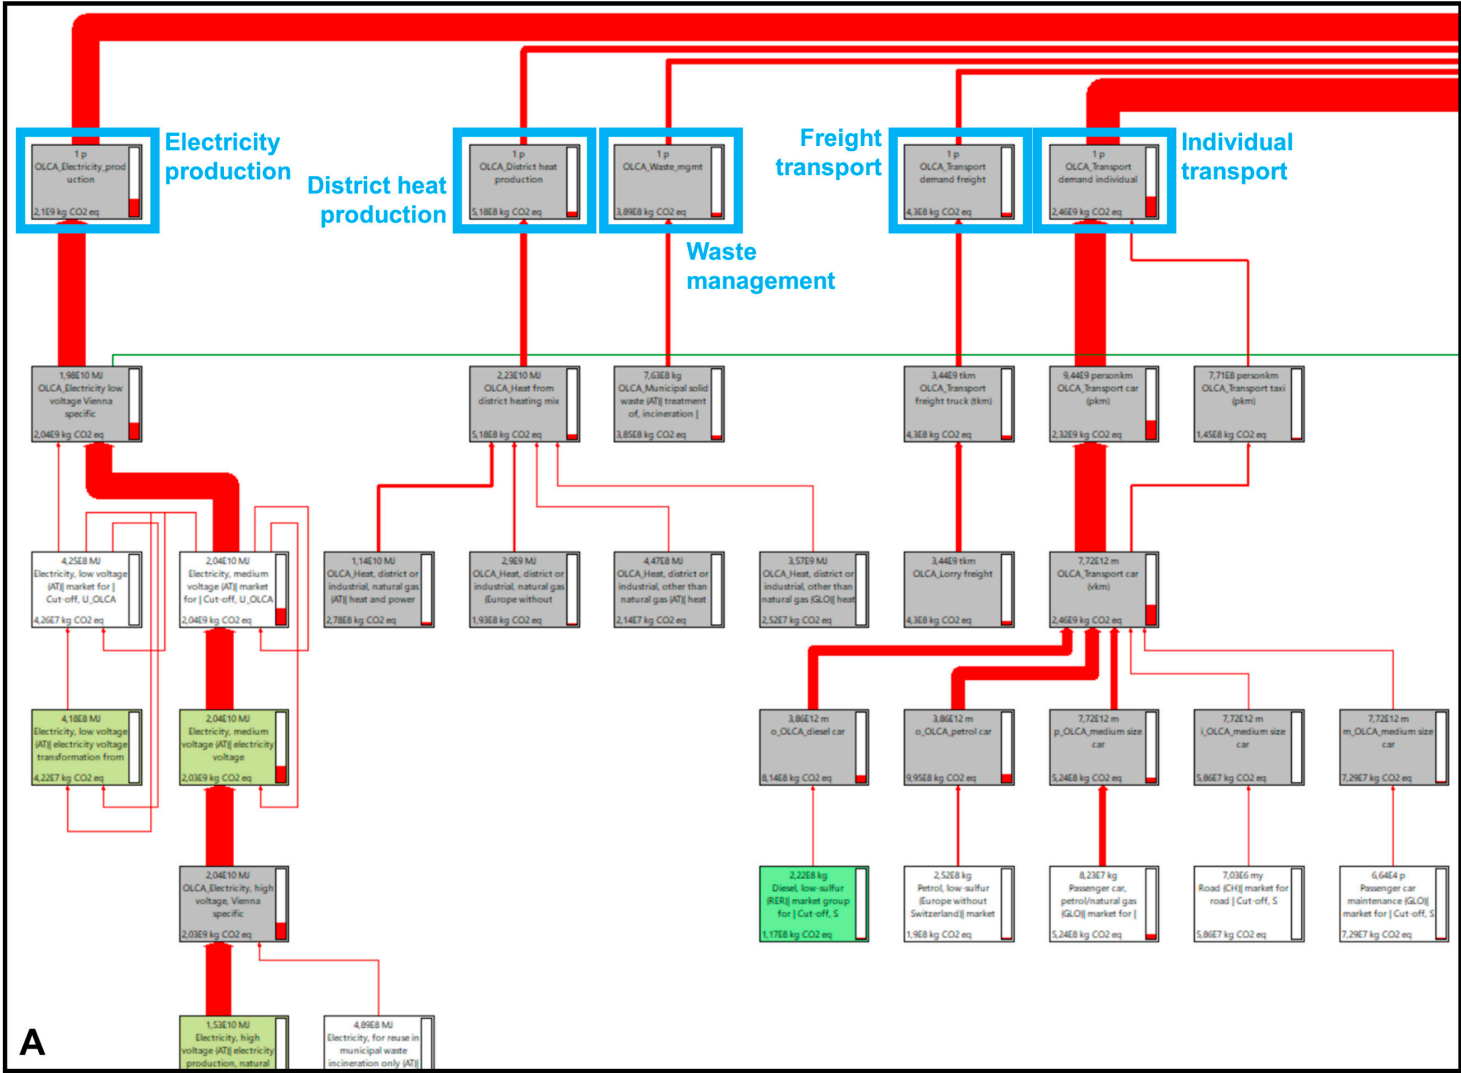

**Figure S2.** Section view "A" of Figure S1, displaying details for electricity production, district heat production, waste management, freight transport, and individual transport.

Supplementary Material S3

1

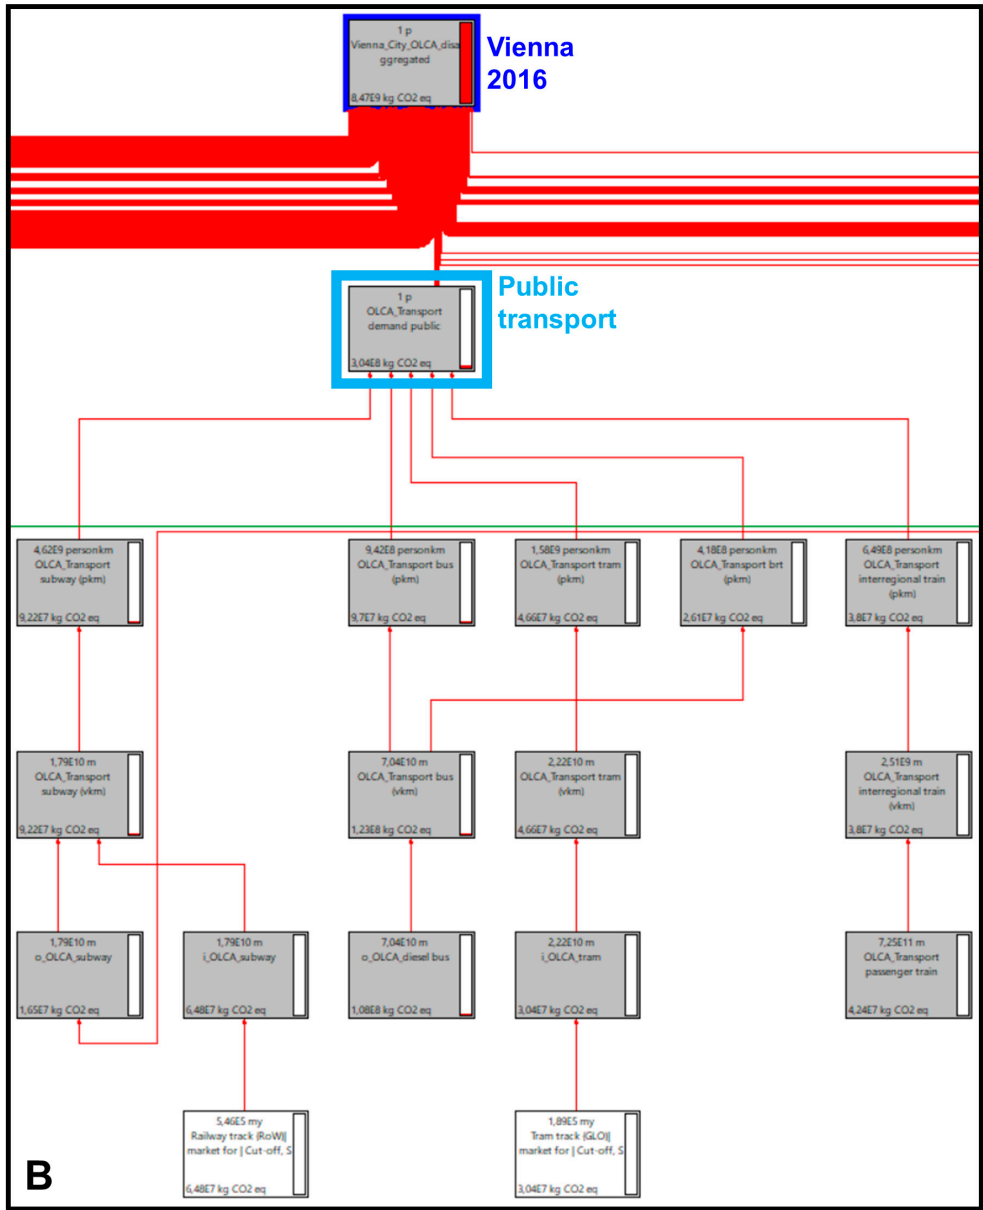

Figure S3. Section view “B” of Figure S1, displaying details for public transport.

2

3

## Supplementary Material S4

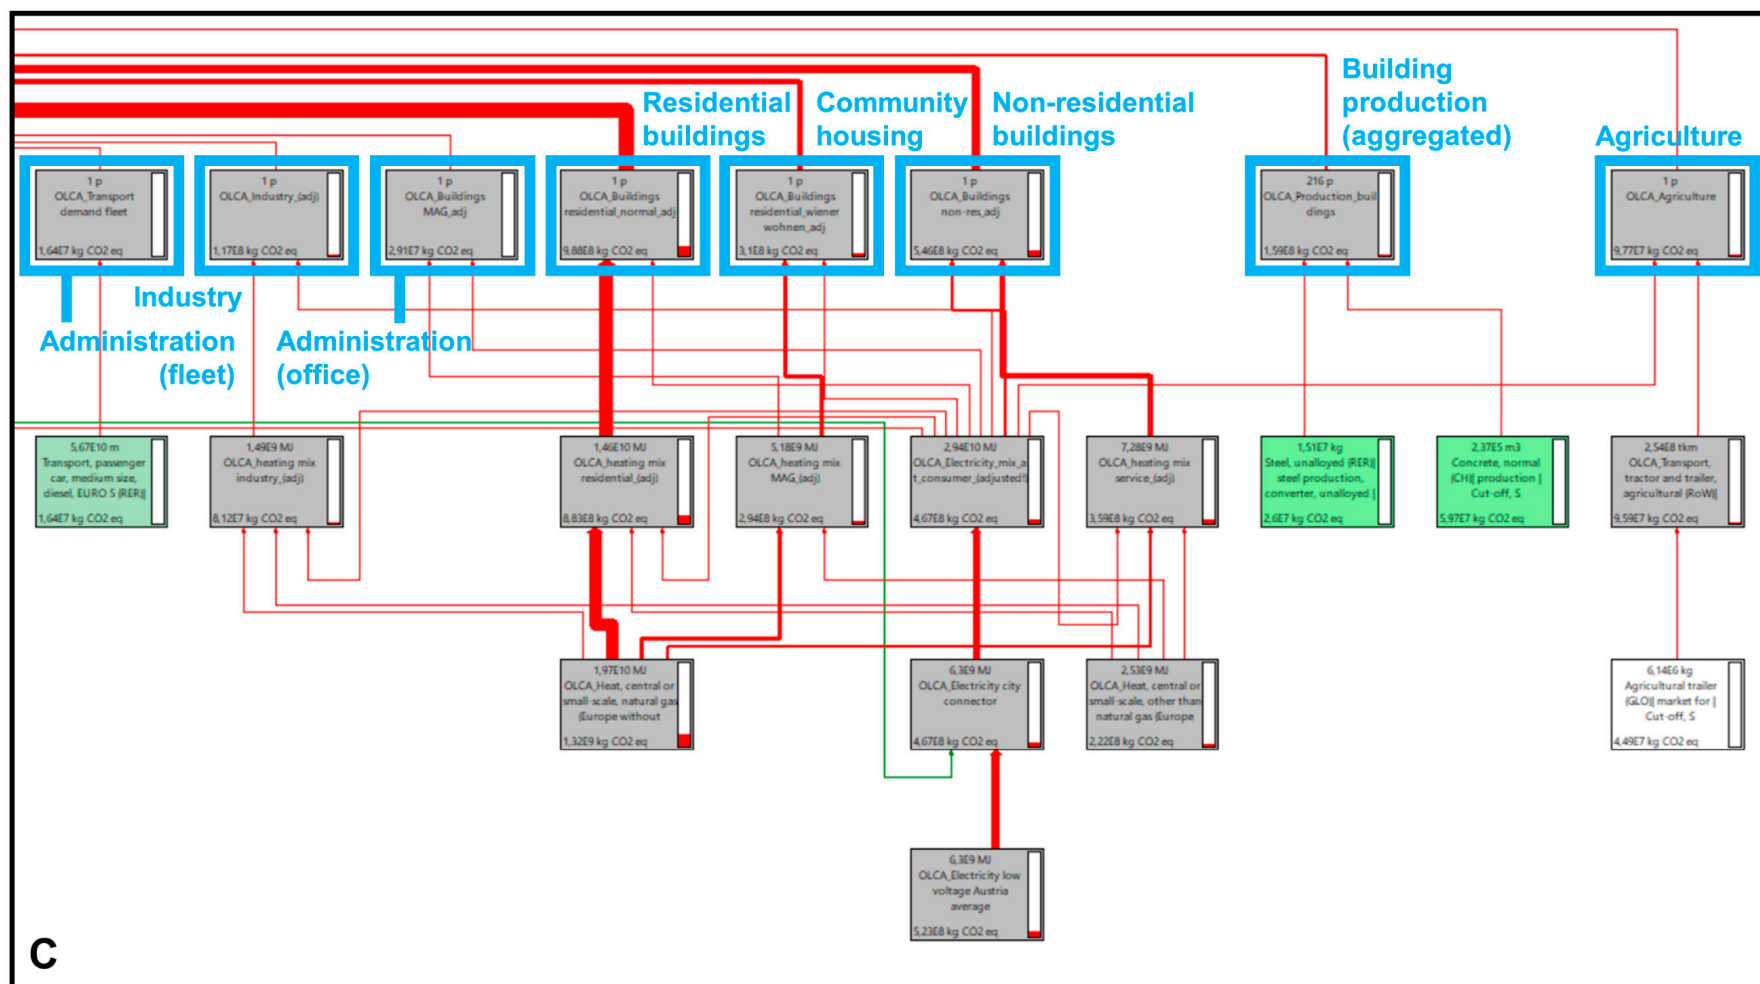

**Figure S5.** Section view “C” of Figure S1, displaying details for administration, industry, residential buildings, community housing, non-residential buildings, building production (aggregated), and agriculture.

## Supplementary Material S5

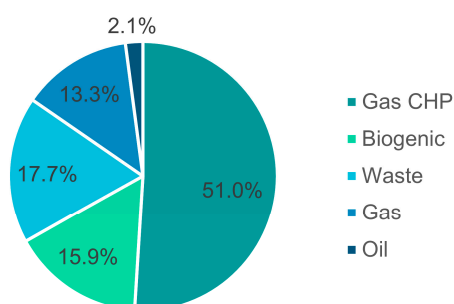

**Figure S5.** District heating mix in Vienna for 2016 (CHP stands for “combined heat and power”).

## Supplementary Material S6

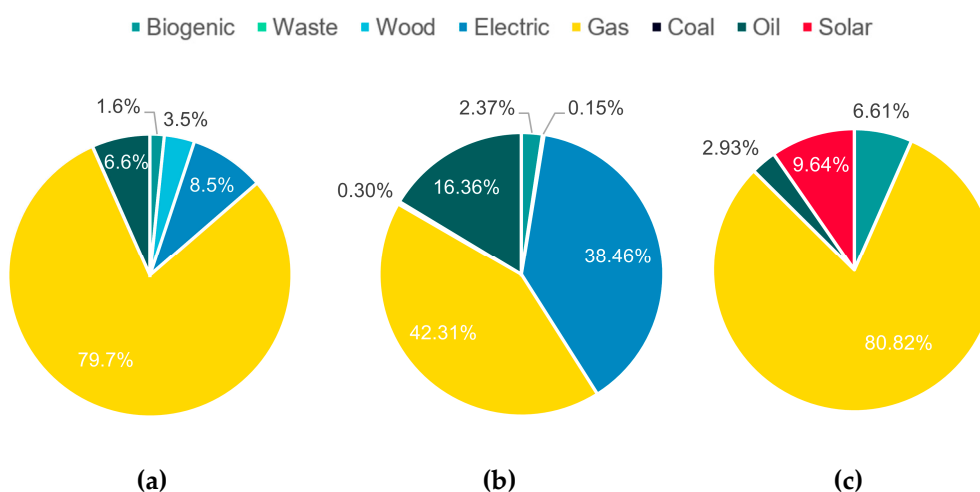

**Figure S6.** Heating mixes in buildings without district heating for (a) Residential buildings, (b) Non-residential buildings, and (c) Administrative and community housing buildings.

## Supplementary Material S7

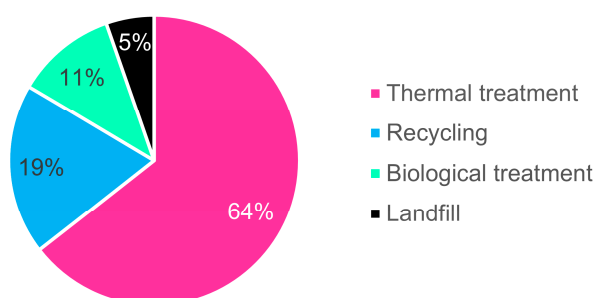

**Figure S7.** Waste treatment pathways.
